# Supplementary material for: Investigating the impact of headaches on the quality of life of patients with glioblastoma multiforme: a qualitative study
Source: PubMed Central journal article supplement — BMJ Open. 2016 Nov 16;6(11):e011616. doi: 10.1136/bmjopen-2016-011616 (PMC5128955; doi:10.1136/bmjopen-2016-011616), 2016-11-16
Supplement: bmjopen-2016-011616supp.pdf [file bmjopen-2016-011616supp.pdf]

### Semi-structured Interview Topic Guide

1. Yourself, your life and living with cancer.
2. What has changed the most since your diagnosis?
3. Have you experienced any headaches since your diagnosis of glioblastoma multiforme?
4. Do you think about the cause of these headaches?
5. Impact of headaches upon sleep?
6. Enquire into coping mechanisms. Do headaches affect ability to cope?
7. If you were to experience more severe headaches what would go through your mind?
